# Supplementary material for: Fluid balance, intradialytic hypotension, and outcomes in critically ill patients undergoing renal replacement therapy: a cohort study
Source: Springer Nature journal article supplement (doi:10.1186/s13054-014-0624-8), 2014-11-18
Supplement: MOESM1 [file 9779860]

**Appendix 1. Distribution of risk factors and outcomes for RRT dependence at hospital discharge in survivors**

| Variable                                                     | All Survivors (n=241) | RRT free at discharge (n=180) | RRT-dependent at discharge (n=61) | p-value |
|--------------------------------------------------------------|-----------------------|-------------------------------|-----------------------------------|---------|
| <i>Demographics</i>                                          |                       |                               |                                   |         |
| Age, years                                                   | 61.0 (16.6)           | 61.1 (16.7)                   | 60.5 (16.6)                       | 0.82    |
| Male                                                         | 148 (61.4%)           | 110 (61.1%)                   | 38 (62.3%)                        | 0.87    |
| Weight, kg (n=197, 147, 50)                                  | 86.2 (24.4)           | 87.4 (25.4)                   | 82.4 (21.2)                       | 0.22    |
| <i>Comorbidities</i>                                         |                       |                               |                                   |         |
| Charlson comorbidity index                                   | 2 (1, 3)              | 2 (0,3)                       | 1 (1,3)                           | 0.54    |
| Congestive heart failure                                     | 43 (17.8%)            | 25 (13.9)                     | 18 (29.5)                         | <0.01   |
| Liver cirrhosis                                              | 4 (1.7%)              | 4 (2.2)                       | 0 (0)                             | 0.99    |
| Baseline creatinine, µmol/L (n=491, 179, 61)                 | 136.6 (86, 206)       | 125 (89, 198)                 | 178 (109, 305)                    | 0.07    |
| <i>Details of ICU Admission</i>                              |                       |                               |                                   |         |
| <i>Admission Type</i>                                        |                       |                               |                                   |         |
| Medical                                                      | 115 (47.7%)           | 79 (43.9%)                    | 36 (59.0%)                        | 0.04    |
| Surgical                                                     | 126 (52.3%)           | 101 (56.1%)                   | 25 (41.0%)                        |         |
| Cardiac surgery                                              | 47 (19.5%)            | 37 (20.6%)                    | 10 (16.4%)                        | 0.48    |
| Aortic aneurysm repair                                       | 19 (7.9%)             | 14 (7.8%)                     | 5 (8.2%)                          | 0.92    |
| <i>Admission Diagnosis (n=238)</i>                           |                       |                               |                                   |         |
| Trauma                                                       | 15 (6.3%)             | 13 (7.3%)                     | 2 (3.4%)                          | 0.13    |
| Cardiovascular                                               | 106 (44.5%)           | 78 (43.6%)                    | 28 (47.5%)                        |         |
| Respiratory                                                  | 24 (10.1%)            | 21 (11.7%)                    | 3 (5.1%)                          |         |
| Gastrointestinal                                             | 26 (10.9%)            | 20 (11.2%)                    | 6 (10.2%)                         |         |
| Neurological                                                 | 6 (2.5%)              | 3 (1.7%)                      | 3 (5.1%)                          |         |
| Renal                                                        | 37 (15.6%)            | 23 (12.9%)                    | 14 (23.7%)                        |         |
| Other                                                        | 24 (10.1%)            | 21 (11.7%)                    | 3 (5.1%)                          |         |
| SOFA on day of ICU admission (n=164, 124, 40)                | 11.6 (4.2)            | 11.7 (4.2)                    | 11.3 (4.2)                        | 0.59    |
| SOFA-cardiovascular on day of ICU admission (n=161, 121, 40) | 3 (1,4)               | 3 (1, 4)                      | 2 (1, 3.5)                        | 0.07    |
| Any vasopressor use on days 1-7                              | 100 (41.5%)           | 76 (42.2%)                    | 24 (39.3%)                        | 0.69    |
| <i>Details of RRT</i>                                        |                       |                               |                                   |         |
| SOFA on day RRT commenced (n=239, 179, 60)                   | 12.8 (3.9)            | 13.1 (3.9)                    | 12.1 (3.8)                        | 0.08    |
| SOFA-cardiovascular on day RRT commenced (n=239, 179, 60)    | 3 (1,4)               | 3 (1, 4)                      | 3 (1, 3.5)                        | 0.67    |
| Days from ICU admission to RRT                               | 2 (1, 4)              | 2 (1, 4)                      | 1 (0, 3)                          | 0.06    |
| <i>Initial RRT modality</i>                                  |                       |                               |                                   |         |
| IHD                                                          | 129 (53.5%)           | 92 (51.1%)                    | 37 (60.7%)                        | 0.12    |
| SLED                                                         | 31 (12.9%)            | 67 (37.2%)                    | 14 (23.0%)                        |         |
| CRRT                                                         | 81 (33.6%)            | 21 (11.7%)                    | 10 (16.4%)                        |         |
| Mean daily fluid balance, mL                                 | 413 (-371, 1106)      | 475 (-400, 1310)              | 71 (-330, 898)                    | 0.36    |
| Positive mean daily fluid balance                            | 151 (62.7%)           | 116 (64.4%)                   | 35 (57.4%)                        | 0.32    |
| Intradialytic hypotension (% days up to 7) (n=240, 179, 61)  | 43 (20, 67)           | 50 (20, 67)                   | 33 (20, 71)                       | 0.86    |
| Days of RRT                                                  | 7 (4, 14)             | 6 (4, 12)                     | 14 (8, 23)                        | <0.001  |
| <i>Clinical outcomes</i>                                     |                       |                               |                                   |         |
| Days of ICU stay                                             | 14 (7, 29)            | 14 (7, 28)                    | 12.5 (6, 33)                      | 0.79    |
| Days of hospital stay                                        | 34 (23, 58)           | 33 (20.5, 60)                 | 39 (25, 54)                       | 0.41    |

Dichotomous data are of the form n (%) and continuous data of the form mean (SD) or median (Q1, Q3). The number of patients with data is provided where this differs from the total. P-values are based on univariable logistic regression, except for days of ICU and hospital stay, days between ICU admission and RRT, and days of RRT, for which Wilcoxon signed-rank tests are reported. Abbreviations: CRRT, continuous renal replacement therapy; ICU, intensive care unit; IHD, intermittent haemodialysis; RRT, renal replacement therapy; SLED, sustained low-efficiency dialysis; SOFA, sequential organ failure assessment score.
