# Supplementary material for: Fluid balance, intradialytic hypotension, and outcomes in critically ill patients undergoing renal replacement therapy: a cohort study
Source: Springer Nature journal article supplement (doi:10.1186/s13054-014-0624-8), 2014-11-18
Supplement: MOESM2 [file 9779860]

**Appendix 2: Patient characteristics and outcomes for subgroups with missing data, and those with and without >10% fluid overload at RRT initiation.**

| Variable                                                                  | Whole cohort (n=492) | Missing data (n=182) | >10% fluid overload (n=125) | ≤10% fluid overload (n=185) | p-value |
|---------------------------------------------------------------------------|----------------------|----------------------|-----------------------------|-----------------------------|---------|
| <i>Demographics</i>                                                       |                      |                      |                             |                             |         |
| Age, years                                                                | 62.9 (16.2)          | 64.2 (15.9)          | 60.9 (16.83)                | 62.9 (16.2)                 | 0.29    |
| Male                                                                      | 299 (60.8%)          | 117 (64.3%)          | 77 (61.6%)                  | 105 (56.8%)                 | 0.40    |
| Weight, kg (n=413)                                                        | 85.2 (24.3)          | 87.2 (22.2)          | 80.7 (19.9)                 | 87.0 (27.6)                 | 0.03    |
| <i>Comorbidities</i>                                                      |                      |                      |                             |                             |         |
| Charlson comorbidity index                                                | 2 (1, 3)             | 2 (1, 3)             | 2 (0, 3)                    | 2 (1, 4)                    | 0.15    |
| Congestive heart failure                                                  | 89 (18.1%)           | 36 (19.8)            | 17 (13.6)                   | 36 (19.5)                   | 0.18    |
| Liver cirrhosis                                                           | 20 (4.1%)            | 8 (4.4)              | 6 (4.8)                     | 6 (3.2)                     | 0.49    |
| Baseline creatinine (n=490, 240, 250)                                     | 123.5 (86, 206)      | 133 (89, 233)        | 101 (80, 149)               | 138 (91.5, 222)             | <0.01   |
| <i>Details of ICU Admission</i>                                           |                      |                      |                             |                             |         |
| Admission Type                                                            |                      |                      |                             |                             |         |
| Medical                                                                   | 241 (49.0%)          | 111 (61.0%)          | 46 (36.8%)                  | 84 (45.4%)                  | 0.13    |
| Surgical                                                                  | 251 (51.0%)          | 71 (39.1%)           | 79 (63.2%)                  | 101 (54.6%)                 |         |
| Cardiac surgery                                                           | 86 (17.5%)           | 24 (13.2%)           | 23 (18.4%)                  | 39 (21.1%)                  | 0.56    |
| Aortic aneurysm repair                                                    | 29 (5.9%)            | 7 (3.9%)             | 8 (6.4%)                    | 14 (7.6%)                   | 0.69    |
| Admission Diagnosis (n=485,175,124,184)                                   |                      |                      |                             |                             |         |
| Trauma                                                                    | 25 (5.2%)            | 12 (6.8%)            | 7 (5.7%)                    | 6 (3.3%)                    | <0.001  |
| Cardiovascular                                                            | 198 (40.8%)          | 78 (44.1%)           | 37 (28.2%)                  | 83 (45.1%)                  |         |
| Respiratory                                                               | 59 (12.2%)           | 17 (9.6%)            | 23 (18.6%)                  | 19 (10.3%)                  |         |
| Gastrointestinal                                                          | 91 (18.8%)           | 29 (16.4%)           | 35 (28.2%)                  | 27 (14.7%)                  |         |
| Neurological                                                              | 11 (2.3%)            | 5 (2.8%)             | 2 (1.6%)                    | 4 (2.2%)                    |         |
| Renal                                                                     | 54 (11.1%)           | 22 (12.4%)           | 4 (4.0%)                    | 27 (14.7%)                  |         |
| Other                                                                     | 47 (9.7%)            | 14 (7.9%)            | 15 (12.1%)                  | 18 (9.8%)                   |         |
| SOFA on day of ICU admission (n=347, 142, 70, 135)                        | 12.1 (4.1)           | 12.1 (4.2)           | 12.2 (3.9)                  | 12.05 (4.3)                 | 0.79    |
| SOFA-cardiovascular on day of ICU admission (n=341, 141, 70,130)          | 3 (1, 4)             | 3 (1, 4)             | 4 (1, 4)                    | 3 (1, 4)                    | 0.38    |
| <i>Details of RRT</i>                                                     |                      |                      |                             |                             |         |
| SOFA on day RRT commenced (n=490, 181, 125,184)                           | 14.2 (4.2)           | 13.1 (4.4)           | 15.8 (3.8)                  | 14.3 (4.0)                  | <0.01   |
| SOFA-cardiovascular on day RRT commenced (n=490, 181,125,184)             | 3 (1, 4)             | 3 (1, 4)             | 4 (1, 4)                    | 3 (1, 4)                    | 0.38    |
| Vasopressor use on days 1-7                                               | 272 (55.3%)          | 74 (40.7%)           | 89 (71.2%)                  | 109 (58.9%)                 | 0.027   |
| Days from ICU admission to RRT                                            | 2 (1, 5.5)           | 1 (0, 5)             | 4 (2, 8)                    | 2 (1, 4)                    | <0.01   |
| Initial RRT modality                                                      |                      |                      |                             |                             |         |
| IHD                                                                       | 212 (43.1%)          | 93 (51.1%)           | 40 (32%)                    | 79 (42.7%)                  | 0.13    |
| SLED                                                                      | 61 (12.4%)           | 25 (13.7%)           | 14 (11.2%)                  | 22 (11.9%)                  |         |
| CRRT                                                                      | 219 (44.5%)          | 64 (35.2%)           | 71 (56.8%)                  | 84 (45.4%)                  |         |
| Days of RRT                                                               | 7 (4, 13)            | 7 (4, 13)            | 7 (4, 14%)                  | 6 (3, 12)                   | 0.27    |
| Mean daily fluid balance, mL                                              | 708 (-69, 1805)      | 657 (-14, 1664)      | 839 (-166, 2241)            | 651 (-71.5, 1688)           | 0.61    |
| Positive mean daily fluid balance                                         | 353 (71.7%)          | 132 (72.5%)          | 89 (71.2%)                  | 132 (71.3%)                 | 0.98    |
| Intradialytic hypotension (percent of days up to 7), (n=490,180,125, 185) | 50.0 (28.6, 80.0)    | 50 (25, 80)          | 60 (43, 87)                 | 50 (25, 75)                 | 0.003   |
| <i>Clinical outcomes</i>                                                  |                      |                      |                             |                             |         |
| Death                                                                     | 251 (51.0%)          | 82 (45.1%)           | 83 (66.4%)                  | 86 (46.5%)                  | <0.01   |
| RRT dependence at discharge for survivors                                 | 61 (25.3.4%)         | 29 (29%)             | 8 (19.0%)                   | 24 (24.2%)                  | 0.50    |

|                       |               |              |             |             |       |
|-----------------------|---------------|--------------|-------------|-------------|-------|
| (n=241,100,99,42)     |               |              |             |             |       |
| Days of ICU stay      | 14 (7, 26.5)  | 13.5 (7, 28) | 18 (9, 28)  | 13 (6, 24)  | <0.01 |
| Days of hospital stay | 28 (15.5, 48) | 28 (16, 46)  | 27 (15, 51) | 28 (16, 49) | 0.62  |

Dichotomous data are of the form n (%) and continuous data of the form mean (SD) or median (Q1, Q3). The number of patients with data is provided where this differs from the total. All p-values are for comparing the group with fluid overload >10% versus ≤10% and are based on t-test or Wilcoxon rank-sum test as appropriate. Fluid overload at RRT commencement was defined as positive cumulative fluid balance >10% of admission weight. Abbreviations: CRRT, continuous renal replacement therapy; ICU, intensive care unit; IHD, intermittent haemodialysis; RRT, renal replacement therapy; SLED, sustained low-efficiency dialysis; SOFA, sequential organ failure assessment score.
